# Supplementary material for: Surface Acoustic Wave Resonator Chip Setup for the Elimination of Interfering Conductivity Responses
Source: MDPI journal article supplement (doi:10.3390/mi15040501), 2024-04-05
Supplement: s1 [file s1]

## Article

# Surface Acoustic Wave Resonator Chip Setup for the Elimination of Interfering Conductivity Responses

Bastian E. Rapp, Achim Voigt, Marian Dirschka, Michael Rapp and Kerstin Länge (corresp.)

## Supplementary Material

### Overview

**Table S1.** Percentages of KCl solutions used to obtain KCl sample concentrations that were not available. KCl solutions of concentrations 0.001 mol/L, 0.01 mol/L, 0.1 mol/L, 1 mol/L, and 3 mol/L were available as conductivity standards and pH electrode storage solution from VWR, Bruchsal, Germany.

**Table S2.** Measurement results obtained with the KCl samples prepared according to Table S1. Conductivity values of the KCl samples measured with a conductometer at room temperature. Difference frequency changes  $\Delta f$  obtained with the KCl samples relative to the corresponding basic device frequencies  $f_0$ . Difference frequency measurements were performed by applying the KCl samples on differently coated SAW resonator chips. Coatings included no coating, thin and Love wave guiding parylene C layers, and Love wave guiding parylene C layer with gold film. Each KCl sample was tested three times per coating, each time using a different SAW resonator chip.

**Figure S1.** Conductivity values of aqueous KCl solutions measured at room temperature.

**Figure S2.** Density (orange circles) and viscosity (blue diamonds) values of aqueous KCl solutions at 20 °C. Data were obtained from Haynes, W.M., *CRC Handbook of Chemistry and Physics*, 95th ed.; CRC Press: Boca Raton, FL, USA, 2014.

---

**Table S1.** Percentages of KCl solutions used to obtain KCl sample concentrations that were not available. KCl solutions of concentrations 0.001 mol/L, 0.01 mol/L, 0.1 mol/L, 1 mol/L, and 3 mol/L were available as conductivity standards and pH electrode storage solution from VWR, Bruchsal, Germany.

| Percentage<br>0.001 mol/L<br>KCl solution | Percentage<br>1 mol/L<br>KCl solution | Percentage<br>3 mol/L<br>KCl solution | KCl sample<br>concentration<br>[mol/L] |
|-------------------------------------------|---------------------------------------|---------------------------------------|----------------------------------------|
| 78%                                       | 22%                                   | -                                     | 0.22078                                |
| 55%                                       | 45%                                   | -                                     | 0.45055                                |
| 33%                                       | 67%                                   | -                                     | 0.67033                                |
| 10%                                       | 90%                                   | -                                     | 0.9001                                 |
| 75%                                       | -                                     | 25%                                   | 0.75075                                |
| 50%                                       | -                                     | 50%                                   | 1.5005                                 |
| 25%                                       | -                                     | 75%                                   | 2.25025                                |

**Table S2.** Measurement results obtained with the KCl samples prepared according to Table S1. Conductivity values of the KCl samples measured with a conductometer at room temperature. Difference frequency changes  $\Delta f$  obtained with the KCl samples relative to the corresponding basic device frequencies  $f_0$ . Difference frequency measurements were performed by applying the KCl samples on differently coated SAW resonator chips. Coatings included no coating, thin and Love wave guiding parylene C layers, and Love wave guiding parylene C layer with gold film. Each KCl sample was tested three times per coating, each time using a different SAW resonator chip.

| KCl sample<br>concentration<br>[mol/L] | KCl sample<br>conductivity<br>[mS/cm] | $\Delta f/f_0$<br>Mean $\pm$ Standard deviation |                                     |                                     |                                        |
|----------------------------------------|---------------------------------------|-------------------------------------------------|-------------------------------------|-------------------------------------|----------------------------------------|
|                                        |                                       | No coating                                      | Thin polymer layer                  | Love wave guiding layer             | Love wave guiding layer<br>+ gold film |
| 0.001                                  | 0.0001                                | $(-0.887 \pm 2.144) \times 10^{-6}$             | $(-1.248 \pm 0.162) \times 10^{-6}$ | $(-9.864 \pm 8.939) \times 10^{-7}$ | $(0.000 \pm 14.451) \times 10^{-7}$    |
| 0.01                                   | 1.263                                 | $(-6.761 \pm 0.070) \times 10^{-5}$             | $(-5.889 \pm 0.060) \times 10^{-5}$ | $(-1.183 \pm 0.085) \times 10^{-5}$ | $(0.000 \pm 0.000) \times 10^{-7}$     |
| 0.1                                    | 12.653                                | $(-8.171 \pm 0.027) \times 10^{-4}$             | $(-4.712 \pm 0.007) \times 10^{-4}$ | $(-1.039 \pm 0.011) \times 10^{-4}$ | $(1.572 \pm 2.722) \times 10^{-7}$     |
| 0.22                                   | 24.853                                | <i>not measurable</i>                           | $(-8.474 \pm 0.129) \times 10^{-4}$ | $(-1.700 \pm 0.023) \times 10^{-4}$ | $(-6.767 \pm 6.963) \times 10^{-7}$    |
| 0.45                                   | 49.853                                | <i>not measurable</i>                           | $(-1.374 \pm 0.136) \times 10^{-3}$ | $(-2.370 \pm 0.204) \times 10^{-4}$ | $(-6.767 \pm 13.207) \times 10^{-7}$   |
| 0.67                                   | 75                                    | <i>not measurable</i>                           | $(-1.523 \pm 0.098) \times 10^{-3}$ | $(-3.637 \pm 0.035) \times 10^{-4}$ | $(6.618 \pm 3.837) \times 10^{-7}$     |
| 0.75                                   | 87                                    | <i>not measurable</i>                           | $(-1.493 \pm 0.079) \times 10^{-3}$ | $(-3.201 \pm 0.199) \times 10^{-4}$ | $(1.011 \pm 0.876) \times 10^{-6}$     |
| 0.9                                    | 100                                   | <i>not measurable</i>                           | $(-1.504 \pm 0.003) \times 10^{-3}$ | $(-3.539 \pm 0.044) \times 10^{-4}$ | $(1.656 \pm 0.511) \times 10^{-6}$     |
| 1                                      | 111                                   | <i>not measurable</i>                           | $(-1.531 \pm 0.001) \times 10^{-3}$ | $(-3.101 \pm 0.008) \times 10^{-4}$ | $(2.461 \pm 0.875) \times 10^{-6}$     |
| 1.5                                    | 166                                   | <i>not measurable</i>                           | <i>not measurable</i>               | $(-3.690 \pm 0.555) \times 10^{-4}$ | $(5.703 \pm 0.149) \times 10^{-6}$     |
| 2.25                                   | 240                                   | <i>not measurable</i>                           | <i>not measurable</i>               | $(-4.118 \pm 0.010) \times 10^{-4}$ | $(9.304 \pm 0.217) \times 10^{-6}$     |
| 3                                      | 308                                   | <i>not measurable</i>                           | <i>not measurable</i>               | $(-4.138 \pm 0.013) \times 10^{-4}$ | $(1.355 \pm 0.058) \times 10^{-5}$     |

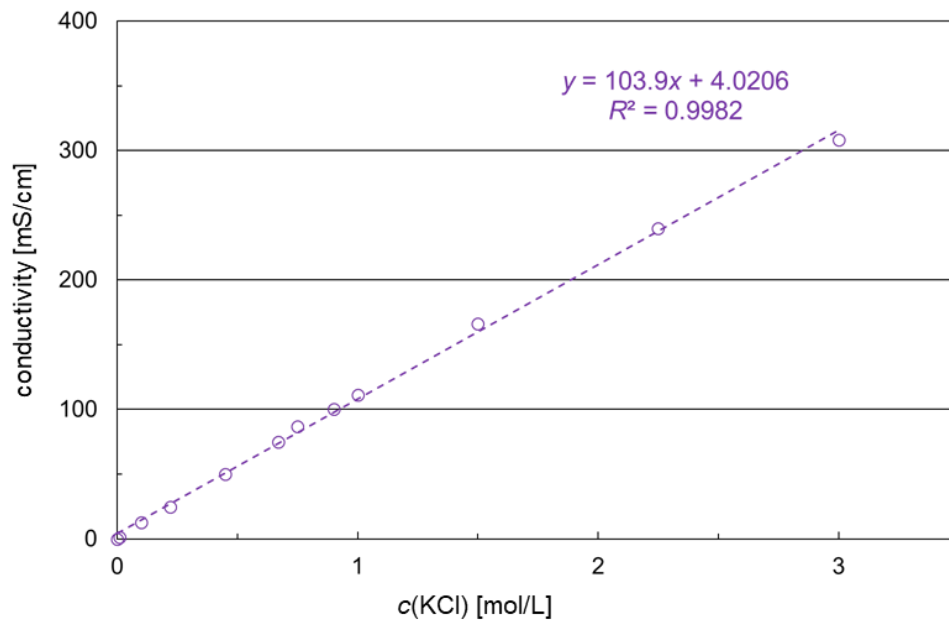

**Figure S1.** Conductivity values of aqueous KCl solutions measured at room temperature.

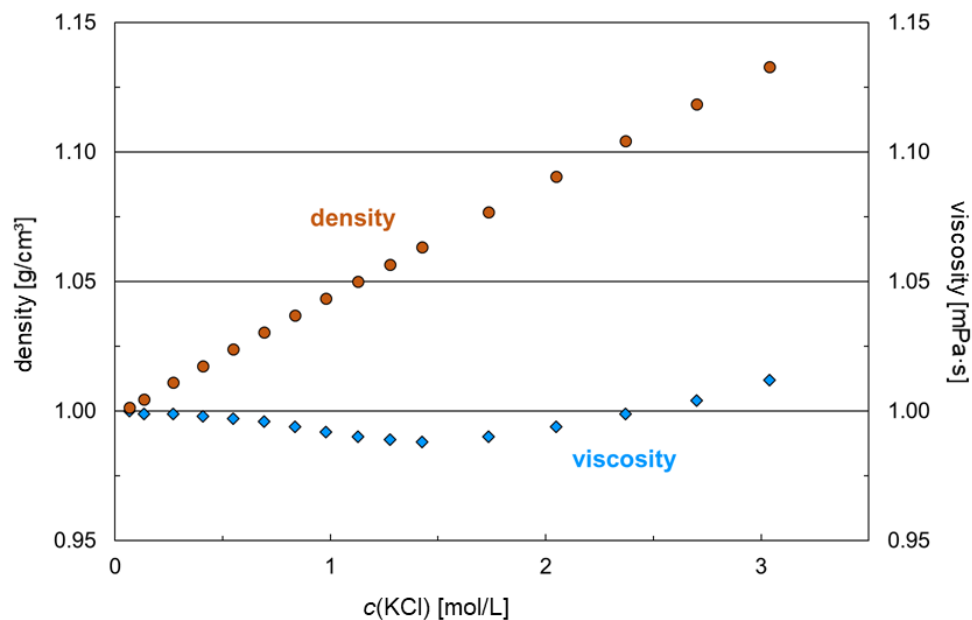

**Figure S2.** Density (orange circles) and viscosity (blue diamonds) values of aqueous KCl solutions at 20 °C. Data were obtained from Haynes, W.M., *CRC Handbook of Chemistry and Physics*, 95th ed.; CRC Press: Boca Raton, FL, USA, 2014.
